# Supplementary material for: A Perspective on Current Flavivirus Vaccine Development: A Brief Review
Source: MDPI journal article supplement (doi:10.3390/v15040860), 2023-03-28
Supplement: s1 [file s1]

**Table S1.** List of flavivirus vaccines currently being tested in clinical trials

| Biological                                                         | Type of Study                                         | Vaccine type              | Phase | Trial registration number | Location      |
|--------------------------------------------------------------------|-------------------------------------------------------|---------------------------|-------|---------------------------|---------------|
| <b>WNV</b>                                                         |                                                       |                           |       |                           |               |
| WN/DEN4Δ30                                                         | Safety, Immunogenicity                                | Chimeric Live attenuated  | 1     | NCT02186626               | United States |
| WN/DEN4Δ30                                                         | Safety, Immunogenicity                                | Chimeric Live attenuated  | 1     | NCT00094718               | United States |
| WN/DEN4Δ30                                                         | Safety, Immunogenicity                                | Chimeric Live attenuated  | 1     | NCT00537147               | United States |
| HydroVax-001                                                       | Safety, Immunogenicity                                | Inactive                  | 1     | NCT02337868               | United States |
| WN-80E                                                             | Safety                                                | Subunit                   | 1     | NCT00707642               | United States |
| VRC-WNV DNA020-00-VP                                               | Safety, Tolerability, Immunogenicity                  | Genomic (DNA)             | 1     | NCT00300417               | United States |
| VRC-WNV DNA017-00-VP                                               | Safety, Immunogenicity                                | Genomic (plasmid DNA)     | 1     | NCT00106769               | United States |
| ChimeriVax-WN02                                                    | Safety, Immunogenicity                                | Chimeric Live attenuated  | 2     | NCT00746798               | United States |
| <b>DENV</b>                                                        |                                                       |                           |       |                           |               |
| LD vehicle-GNP, LD PepGNP-Dengue, HD vehicle-GNP, HD PepGNP-Dengue | Safety (Co-administration)                            | Genomic (DNA)             | 1     | NCT04935801               | Switzerland   |
| rDEN3Δ30                                                           | Safety, Immunogenicity                                | Live attenuated           | 1     | NCT02684383               | United States |
| TetraVax-DV TV005                                                  | Safety, Immunogenicity                                | Chimeric Live attenuated  | 1     | NCT02879266               | United States |
| TetraVax-DV-TV005, rDEN3Δ30                                        | Safety, Efficacy (Co-administration)                  | Chimeric Live attenuated  | 1     | NCT02873260               | United States |
| TV005 vaccine                                                      | Safety, Immunogenicity                                | Live attenuated           | 2     | NCT02678455               | Bangladesh    |
| TDENV-LAV, TDENV-PIV                                               | Safety, Immunogenicity (Co-administration)            | Live attenuated, Inactive | 1     | NCT02239614               | United States |
| rDEN2Δ30-7169                                                      | Safety, Immunogenicity                                | Live attenuated           | 1     | NCT02433652               | United States |
| TDV                                                                | Safety, Immunogenicity                                | Live attenuated           | 3     | NCT03771963               | United States |
| TDV                                                                | Safety, Immunogenicity                                | Live attenuated           | 1     | NCT01110551               | United States |
| V180, Alhydrogel™                                                  | Safety, Tolerability, Immunogenicity                  | Subunit                   | 1     | NCT02450838               | United States |
| TDV                                                                | Safety, Immunogenicity                                | Live attenuated           | 1     | NCT01110551               | United States |
| DENV-1-LVHC, TDENV-PIV                                             | Longevity (Co-administration)                         | Live attenuated           | 1     | NCT04786457               | United States |
| DENV-1 PIV                                                         | Longevity                                             | Inactive                  | 1     | NCT01502735               | United States |
| TetraVax-DV-TV003                                                  | Efficacy                                              | Chimeric Live attenuated  | 1     | NCT03416036               | United States |
| T-DEN F17                                                          | Safety, Immunogenicity                                | Live attenuated           | 1, 2  | NCT00322049               | Thailand      |
| TDV                                                                | Safety, Immunogenicity                                | Live attenuated           | 3     | NCT03341637               | Mexico        |
| TetraVax-DV                                                        | Safety, Immunogenicity                                | Chimeric Live attenuated  | 1     | NCT01436422               | United States |
| WRAIR                                                              | Longevity                                             | Live attenuated           | 1     | NCT00239577               | United States |
| rDEN2/4Δ30                                                         | Safety, Immunogenicity                                | Live attenuated           | 1     | NCT01073306               | United States |
| TDENV-PIV                                                          | Safety, Immunogenicity                                | Inactive                  | 1     | NCT01702857               | Puerto Rico   |
| rDEN1Δ30                                                           | Safety, Immunogenicity                                | Live attenuated           | 1     | NCT01084291               | United States |
| TDENV-PIV with Alum and AS03B1 adjuvant                            | Safety, Immunogenicity                                | Inactive                  | 1     | NCT01666652               | United States |
| D1ME100                                                            | Safety, Immunogenicity                                | Genomic (DNA)             | 1     | NCT00290147               | United States |
| rDEN1Δ30, rDEN2Δ30-7169                                            | Longevity (Co-administration)                         | Live attenuated           | 1     | NCT02392325               | United States |
| TetraVax-DV                                                        | safety and immunogenicity                             | Chimeric Live attenuated  | 1     | NCT01072786               | United States |
| 9vHPV, TDV                                                         | Safety, Immunogenicity, Longevity (Co-administration) | Inactive, Live attenuated | 3     | NCT04313244               | Thailand      |
| TDV                                                                | Safety, Immunogenicity, Longevity                     | Live attenuated           | 2     | NCT03746015               | United States |

|                                                           |                                                          |                                           |      |             |                                                    |
|-----------------------------------------------------------|----------------------------------------------------------|-------------------------------------------|------|-------------|----------------------------------------------------|
| TV005, rDEN2Δ30-7169                                      | Safety, Immunogenicity, Longevity (Co-administration)    | Live attenuated                           | 1    | NCT02317900 | United States                                      |
| TAK-003                                                   | Longevity                                                | Inactive                                  | 3    | NCT03423173 | United States                                      |
| rDEN2Δ30-7169                                             | Safety, Immunogenicity                                   | Live attenuated                           | 1    | NCT01931176 | United States                                      |
| TV003                                                     | Safety, Immunogenicity, Longevity                        | Inactive                                  | 2    | NCT02332733 | Thailand                                           |
| F12, JE                                                   | Safety, Immunogenicity                                   | Live attenuated                           | 1, 2 | NCT00384670 | Thailand                                           |
| TetraVax-DV-TV003, rDEN2Δ30-7169                          | Longevity, Efficacy                                      | Chimeric Live attenuated                  | 1    | NCT02021968 | United States                                      |
| rDEN3delta30/31-7164                                      | Safety, Immunogenicity                                   | Live attenuated                           | 1    | NCT00831012 | United States                                      |
| rDEN1delta30                                              | Safety, Immunogenicity                                   | Live attenuated                           | 1    | NCT00473135 | United States                                      |
| V180-001                                                  | Safety, Tolerability, Immunogenicity                     | Subunit                                   | 1    | NCT01477580 | NA                                                 |
| rDEN3/4delta30(ME)                                        | Safety, Immunogenicity                                   | Live attenuated                           | 1    | NCT00375726 | United States                                      |
| rDEN4delta30-4995                                         | Safety, Immunogenicity                                   | Live attenuated                           | 1    | NCT00322946 | United States                                      |
| TetraVax-DV                                               | Safety, Immunogenicity, Longevity                        | Chimeric Live attenuated                  | 1    | NCT01506570 | United States                                      |
| HD-TDV                                                    | Safety, Immunogenicity, Longevity                        | Live attenuated                           | 2    | NCT02425098 | Singapore                                          |
| TDV IDT                                                   | Safety, Immunogenicity                                   | Live attenuated                           | 2    | NCT02193087 | United States                                      |
| TVDV, Vaxfectin                                           | Safety, Tolerability, Immunogenicity (Co-administration) | Genomic (DNA)                             | 1    | NCT01502358 | United States                                      |
| YF-17D, TDV                                               | Safety, Immunogenicity, Longevity (Co-administration)    | Live attenuated                           | 3    | NCT03342898 | United States                                      |
| rDEN4delta30-200,201                                      | Safety, Immunogenicity (Co-administration)               | Live attenuated                           | 1    | NCT00270699 | United States                                      |
| TDV                                                       | Safety, Immunogenicity, Longevity                        | Live attenuated                           | 2    | NCT02302066 | Dominican Republic, Panama and Philippines         |
| rDEN2/4delta30(ME)                                        | Safety, Immunogenicity                                   | Live attenuated                           | 1    | NCT00094705 | United States                                      |
| rDEN1delta30                                              | Safety, Immunogenicity                                   | Live attenuated                           | 1    | NCT00089908 | United States                                      |
| CYD                                                       | Safety, Immunogenicity                                   | Chimeric Live attenuated                  | 2    | NCT01187433 | Brazil                                             |
| rDEN3-3'D4delta30                                         | Safety, Immunogenicity                                   | Live attenuated                           | 1    | NCT00712803 | United States                                      |
| rDEN2/4delta30(ME)                                        | Safety, Immunogenicity                                   | Live attenuated                           | 1    | NCT00920517 | United States                                      |
| T-DEN F17, T-DEN F19                                      | Safety, Immunogenicity (Co-administration)               | Live attenuated                           | 1    | NCT00370682 | Thailand                                           |
| CYD, DTaP-IPV//Hib                                        | Safety, Immunogenicity, Longevity (Co-administration)    | Chimeric Live attenuated, Live attenuated | 3    | NCT01411241 | Mexico                                             |
| 45AZ5 PDK-27, S16803 PDK-50, CH53489 PDK-20, 341750 PDK-6 | Safety, Immunogenicity, Longevity (Co-administration)    | Live attenuated                           | 2    | NCT00350337 | United States                                      |
| CYD                                                       | Longevity                                                | Chimeric Live attenuated                  | 2    | NCT02824198 | Singapore                                          |
| rDEN1delta30, rDEN2/4delta30(ME)                          | Safety, Immunogenicity (Co-administration)               | Live attenuated                           | 1    | NCT00458120 | United States                                      |
| DEN vaccine F17                                           | Safety, Immunogenicity, Longevity                        | Live attenuated                           | 1, 2 | NCT01843621 | Thailand                                           |
| CYD                                                       | Safety, Immunogenicity                                   | Chimeric Live attenuated                  | 1    | NCT02623725 | Brazil, Colombia, Honduras, Mexico And Puerto Rico |
| CYD                                                       | Safety, Immunogenicity, Longevity                        | Chimeric Live attenuated                  | 3    | NCT01254422 | Malaysia                                           |
| CYD                                                       | Safety, Immunogenicity, Longevity                        | Chimeric Live attenuated                  | 2    | NCT02628444 | Colombia, Philippines                              |
| CYD                                                       | Longevity                                                | Chimeric Live attenuated                  | 3    | NCT01134263 | Australia                                          |
| CYD, OKAVAX, AVAXIM                                       | Safety, Immunogenicity (Co-administration)               | Chimeric Live attenuated                  | 2    | NCT01064141 | Philippines                                        |

|                                |                                                       |                                           |      |             |                                                     |
|--------------------------------|-------------------------------------------------------|-------------------------------------------|------|-------------|-----------------------------------------------------|
| TV003                          | Safety, Immunogenicity, Longevity                     | Live attenuated                           | 1    | NCT01782300 | United States                                       |
| TDENV-PIV                      | Safety, Immunogenicity                                | Inactive                                  | 1, 2 | NCT02421367 | United States                                       |
| CYD                            | Longevity                                             | Chimeric Live attenuated                  | 2    | NCT01943825 | United States                                       |
| TDV                            | Safety, Immunogenicity                                | Live attenuated                           | 1    | NCT01224639 | Colombia                                            |
| TDV                            | Safety, Immunogenicity                                | Live attenuated                           | 1    | NCT01728792 | United States                                       |
| CYD                            | Safety, Immunogenicity, Longevity                     | Chimeric Live attenuated                  | 2    | NCT01550289 | India                                               |
| CYD                            | Safety, Immunogenicity, Longevity                     | Chimeric Live attenuated                  | 2    | NCT00617344 | United States                                       |
| CYD                            | Efficacy, Safety, Longevity                           | Chimeric Live attenuated                  | 3    | NCT01373281 | Indonesia, Malaysia, Philippines, Thailand, Vietnam |
| TV003                          | Safety, Immunogenicity                                | Inactive                                  | 2    | NCT03485144 | Taiwan                                              |
| CYD                            | Safety, Efficacy, Longevity                           | Chimeric Live attenuated                  | 3    | NCT01374516 | Brazil, Colombia, Honduras, Mexico, Puerto Rico     |
| CYD                            | Safety, Immunogenicity, Longevity                     | Chimeric Live attenuated                  | 2    | NCT02993757 | Malaysia                                            |
| CYD                            | Safety, Immunogenicity                                | Chimeric Live attenuated                  | 3    | NCT02979535 | Mexico                                              |
| WRAIR                          | Safety, Immunogenicity, Longevity                     | Live attenuated                           | 2    | NCT00468858 | Puerto Rico                                         |
| Stamaril®, CYD                 | Safety, Immunogenicity, Longevity (Co-administration) | Chimeric Live attenuated, Live attenuated | 3    | NCT01436396 | Colombia, Peru                                      |
| rDEN4delta30                   | Safety, Immunogenicity                                | Live attenuated                           | 1    | NCT00919178 | United States                                       |
| ChimeriVax™ Dengue Tetravalent | Safety, Immunogenicity, Longevity                     | Chimeric Live attenuated                  | 2    | NCT00730288 | Australia                                           |
| CYD-1,2,3,4, VDV-2, JE-VAX®    | Safety, Immunogenicity (Co-administration)            | Chimeric Live attenuated                  | 2    | NCT00740155 | Mexico                                              |
| CYD, Verorab®                  | Safety, Immunogenicity, Longevity (Co-administration) | Chimeric Live attenuated, Live attenuated | 2    | NCT00842530 | Thailand                                            |
| CYD                            | Safety, Immunogenicity, Longevity                     | Chimeric Live attenuated                  | 2    | NCT00993447 | Colombia, Honduras, Mexico, Puerto Rico             |
| CYD                            | Safety, Immunogenicity, Longevity                     | Chimeric Live attenuated                  | 2    | NCT00875524 | Vietnam                                             |
| CYD                            | Safety, Immunogenicity                                | Chimeric Live attenuated                  | 2    | NCT00880893 | Singapore                                           |
| CYD, YF VAX®                   | Safety, Immunogenicity (Co-administration)            | Chimeric Live attenuated                  | 2    | NCT00788151 | Peru                                                |
| HBV-001 D1                     | Safety                                                | Recombinant protein                       | 1    | NCT00936429 | United States                                       |
| TDV                            | Safety, Immunogenicity                                | Live attenuated                           | 1    | NCT01542632 | United States                                       |
| Dengusil                       | Safety, Immunogenicity                                | Live attenuated                           | 1    | NCT04035278 | Australia                                           |
| TDV                            | Safety, Immunogenicity                                | Live attenuated                           | 1    | NCT01542632 | United States                                       |
| TDV                            | Safety, Immunogenicity, Longevity                     | Live attenuated                           | 2    | NCT01511250 | Colombia, Puerto Rico, Singapore, Thailand          |
| TDV                            | Safety, Immunogenicity, Longevity                     | Live attenuated                           | 2    | NCT02948829 | Panama, Philippines,                                |
| TDV                            | Safety, Immunogenicity, Longevity                     | Live attenuated                           | 3    | NCT03525119 | United Kingdom                                      |
| LGT(TP21)/DEN4                 | Safety, Immunogenicity                                | Chimeric Live attenuated                  | 1    | NCT00118924 | United States                                       |
| WN/DEN4delta30                 | Safety, Immunogenicity                                | Chimeric Live attenuated                  | 1    | NCT00537147 | United States                                       |
| WN/DEN4delta30                 | Safety, Immunogenicity                                | Chimeric Live attenuated                  | 1    | NCT00094718 | United States                                       |
| WN/DEN4delta30                 | Safety, Immunogenicity                                | Chimeric Live attenuated                  | 1    | NCT01765426 | United States                                       |
| <b>ZIKV</b>                    |                                                       |                                           |      |             |                                                     |
| ZPIV                           | Safety, Immunogenicity                                | Inactive                                  | 1    | NCT02937233 | United States                                       |
| ZPIV                           | Safety, Immunogenicity                                | Inactive                                  | 1    | NCT02952833 | United States                                       |
| rZIKV/D4Δ30-713                | Safety, Immunogenicity                                | Live attenuated                           | 1    | NCT03611946 | United States                                       |
| mRNA-1893                      | Safety, Tolerability, Immunogenicity                  | Genomic (mRNA)                            | 1    | NCT04064905 | United States, Puerto Rico                          |

|                                                                                                            |                                            |                                           |   |             |                           |
|------------------------------------------------------------------------------------------------------------|--------------------------------------------|-------------------------------------------|---|-------------|---------------------------|
| MV-ZIKA-RSP                                                                                                | Safety, Immunogenicity                     | Viral vector-based                        | 1 | NCT04033068 | Austria                   |
| MV-ZIKA-RSP                                                                                                | Safety, Immunogenicity                     | Viral vector-based                        | 1 | NCT02996890 | Austria                   |
| ZPIV                                                                                                       | Safety, Immunogenicity                     | Inactive                                  | 1 | NCT03008122 | Puerto Rico               |
| ZPIV with aluminum hydroxide adjuvant.                                                                     | Safety, Reactogenicity, Immunogenicity     | Inactive                                  | 1 | NCT02963909 | United States             |
| VRC-ZKADNA085-00-VP                                                                                        | Safety, Immunogenicity                     | Genomic (DNA)                             | 1 | NCT02840487 | United States             |
| VRC-ZKADNA090-00-VP                                                                                        | Safety, Immunogenicity                     | Genomic (DNA)                             | 1 | NCT02996461 | United States             |
| VLA1601                                                                                                    | Safety, Immunogenicity                     | Inactive                                  | 1 | NCT03425149 | United States             |
| mRNA-1325                                                                                                  | Safety, Tolerability, Immunogenicity       | Genomic (mRNA)                            | 1 | NCT03014089 | United States             |
| ChAdOx1 Zika                                                                                               | Safety, Immunogenicity                     | Subunit                                   | 1 | NCT04015648 | United Kingdom            |
| BBV121                                                                                                     | Safety, Immunogenicity                     | Inactive                                  | 1 | NCT04478656 | India                     |
| VRC-ZKADNA090-00-VP                                                                                        | Safety, Immunogenicity, Efficacy           | Genomic (DNA)                             | 2 | NCT03110770 | United States             |
| GLS-5700                                                                                                   | Safety, Tolerability, Immunogenicity       | Genomic (DNA)                             | 1 | NCT02887482 | Puerto Rico               |
| GLS-5700                                                                                                   | Safety, Tolerability, Immunogenicity       | Genomic (DNA)                             | 1 | NCT02809443 | United States, Canada     |
| <b>YFV</b>                                                                                                 |                                            |                                           |   |             |                           |
| XRX-001                                                                                                    | Safety, Tolerability, Immunogenicity       | Inactivated                               | 1 | NCT00995865 | United States             |
| YFV-17D                                                                                                    | Immunogenicity                             | Live attenuated                           |   | NCT00616356 | United States             |
| YEFE                                                                                                       | Safety, Immunogenicity                     | Live attenuated                           | 4 | NCT02991495 | Kenya and Uganda          |
| Stamaril                                                                                                   | Immunogenicity                             | Live attenuated                           | 3 | NCT01426243 | France                    |
| ChimeriVax™-JE, Stamaril                                                                                   | Safety, Immunogenicity (Co-administration) | Chimeric Live attenuated                  | 2 | NCT00982137 | Australia                 |
| Stamaril                                                                                                   | Immunogenicity                             | Live attenuated                           | 2 | NCT03116802 | Singapore                 |
| CYD, Stamaril®, MMR, Pneumococcal Conjugated Vaccine, Hepatitis A Pediatric Vaccine, DTaP IPV//Hib Vaccine | Safety, Immunogenicity (Co-administration) | Chimeric Live attenuated, Live attenuated | 3 | NCT01436396 | Colombia and Peru         |
| IXIARO, Stamaril®                                                                                          | Efficacy (Co-administration)               | Inactive and Live attenuated              | 2 | NCT01943305 | Singapore                 |
| 17D YF, YF-VAX®                                                                                            | Safety, Immunogenicity (Co-administration) | Live attenuated                           | 1 | NCT00254826 | United States             |
| MMR/YF                                                                                                     | Immunogenicity                             | Live attenuated                           | 4 | NCT03368495 | Argentina                 |
| YF VAX®, CYD Dengue Vaccine                                                                                | Immunogenicity (Co-administration)         | Chimeric Live attenuated                  | 2 | NCT01488890 | United States             |
| YF-17D, DENVax                                                                                             | Immunogenicity, Safety (Co-administration) | Live attenuated                           | 3 | NCT03342898 | United States             |
| YFV-17D                                                                                                    | Immunogenicity                             | Live attenuated                           | 2 | NCT00723489 | United States             |
| Stamaril, SB257049, MR-Vac, Vitamin A                                                                      | Safety, Immunogenicity (Co-administration) | Live attenuated                           | 3 | NCT02699099 | Ghana                     |
| GSK 257049, Tritanrix™ HepB/Hib, Rouvax™, Stamaril™, Polio Sabin™                                          | Safety, Immunogenicity (Co-administration) | Live attenuated                           | 2 | NCT00436007 | Gabon, Ghana and Tanzania |
| <b>TBEV</b>                                                                                                |                                            |                                           |   |             |                           |
| TBE vaccine                                                                                                | Safety, Immunogenicity, Tolerability       | Not available                             | 3 | NCT04648241 | Japan                     |

|                         |                                            |                          |      |             |                                                    |
|-------------------------|--------------------------------------------|--------------------------|------|-------------|----------------------------------------------------|
| Encepur, FSME-IMMUN     | Longevity (Co-administration)              | Inactive                 | 4    | NCT01106482 | Germany                                            |
| LGT(TP21)/DEN4          | Safety, Immunogenicity                     | Live attenuated          | 1    | NCT00118924 | United States                                      |
| TicoVac                 | Longevity                                  | Inactive                 | 4    | NCT01710189 | United Kingdom                                     |
| TBEvac                  | Longevity                                  | Inactive                 | 4    | NCT01562444 | Czechia                                            |
| FSME-immune             | Longevity                                  | Inactive                 | 2, 3 | NCT02318069 | Finland, Sweden                                    |
| FSME-Immun              | Longevity                                  | Inactive                 | 4    | NCT00804219 | Austria                                            |
| FSME Immun              | Longevity                                  | Inactive                 | 2    | NCT01991067 | Austria                                            |
| FSME-IMMUN              | Longevity                                  | Inactive                 | 4    | NCT01582698 | Poland                                             |
| FSME-IMMUN              | Safety                                     | Inactive                 | 3    | NCT00161863 | Austria, Germany, Poland                           |
| FSME-IMMUN              | Safety, Immunogenicity                     | Inactive                 | 2    | NCT00161798 | Germany                                            |
| FSME-IMMUN              | Longevity                                  | Inactive                 | 4    | NCT00161785 | Poland                                             |
| FSME IMMUN New          | Safety, Immunogenicity                     | Inactive                 | 2    | NCT00161772 | Austria, Germany                                   |
| FSME-IMMUN              | Longevity                                  | Inactive                 | 4    | NCT00894686 | Austria, Germany, Poland                           |
| FSME-IMMUN              | Longevity                                  | Inactive                 | 4    | NCT02511535 | Austria                                            |
| FSME-IMMUN, Encepur     | Safety, Immunogenicity (Co-administration) | Inactive                 | 3    | NCT00840801 | Austria, Czech Republic                            |
| FSME-IMMUN              | Longevity                                  | Inactive                 | 4    | NCT00503529 | Poland                                             |
| Encepur Adults          | Longevity                                  | Inactive                 | 4    | NCT03294135 | Czechia                                            |
| FSME Immun CC           | Longevity                                  | Inactive                 | 4    | NCT00461695 | Switzerland                                        |
| FSME-IMMUN, TicoVac     | Longevity (Co-administration)              | Inactive                 | 4    | NCT00163618 | Austria                                            |
| FSME Immun              | Longevity                                  | Inactive                 | 4    | NCT00163540 | Belgium                                            |
| FSME Immun              | Safety, Immunogenicity                     | Inactive                 | 4    | NCT00161954 | Belgium                                            |
| FSME Immun              | Longevity                                  | Inactive                 | 3    | NCT00161876 | Poland                                             |
| TICOVAC                 | Safety, Immunogenicity                     | Inactive                 | 2, 3 | NCT00161746 | Austria                                            |
| FSME Immun              | Longevity                                  | Inactive                 | 3    | NCT00460486 | Poland                                             |
| FSME Immun              | Longevity                                  | Inactive                 | 2    | NCT00161889 | Germany                                            |
| FSME Immun              | Longevity                                  | Inactive                 | 2    | NCT00161850 | Austria and Germany                                |
| FSME IMMUN New, ENCEPUR | Safety, Tolerability (Co-administration)   | Inactive                 | 3    | NCT00161824 | Poland                                             |
| <b>JEV</b>              |                                            |                          |      |             |                                                    |
| JECEVAX                 | Safety                                     | Inactive                 | 2    | NCT03204227 | Vietnam                                            |
| IMOJEV®                 | Safety, Immunogenicity                     | Chimeric live attenuated | 3    | NCT02492165 | Vietnam                                            |
| IMOJEV®                 | Safety, Immunogenicity                     | Chimeric live attenuated | 3    | NCT01900444 | Korea                                              |
| IMOJEV®                 | Safety, Immunogenicity, Longevity          | Chimeric live attenuated | 4    | NCT01981967 | Thailand                                           |
| IXIARO (IC51)           | Safety, Immunogenicity, Longevity          | Inactive                 | 4    | NCT01158599 | Austria, Germany                                   |
| IXIARO                  | Longevity                                  | Inactive                 | 3    | NCT01296360 | Philippines                                        |
| SA14-14-2               | Longevity                                  | Live attenuated          | 4    | NCT01656200 | India                                              |
| IMOJEV™, SA14-14-2      | Safety, Immunogenicity (Co-administration) | Live attenuated          | 3    | NCT01396512 | Korea                                              |
| SA 14-14-2              | Safety, Immunogenicity                     | Live attenuated          | 4    | NCT01567865 | Bangladesh                                         |
| IC51, JE-VAX            | Safety, Immunogenicity (Co-administration) | Inactive                 | 3    | NCT00595465 | Austria, Germany                                   |
| SA 14-14-2              | Safety, Immunogenicity, Longevity          | Live attenuated          | 4    | NCT00463684 | Sri Lanka,                                         |
| SA 14-14-2              | Longevity                                  | Live attenuated          | 3    | NCT00412516 | Philippines                                        |
| SA 14-14-2              | Safety, Immunogenicity                     | Live attenuated          | 3    | NCT01047839 | Australia, United States, Denmark, Germany, Sweden |
| SA 14-14-2              | Longevity                                  | Live attenuated          | 4    | NCT01635816 | Bangladesh                                         |
| SA 14-14-2              | Safety, Immunogenicity, Longevity          | Live attenuated          | 4    | NCT00463476 | Sri Lanka                                          |

|                                   |                                                          |                                           |      |             |                                   |
|-----------------------------------|----------------------------------------------------------|-------------------------------------------|------|-------------|-----------------------------------|
| SA 14-14-2                        | Safety, Tolerability, Immunogenicity                     | Live attenuated                           | 2    | NCT00319592 | United States                     |
| ChimeriVax™-JE, JE-VAX            | Safety, Immunogenicity, Tolerability (Co-administration) | Chimeric live attenuated, Inactive        | 2, 3 | NCT00314145 | United States, Australia          |
| ChimeriVax™-JE                    | Safety, Tolerability                                     | Chimeric live attenuated                  | 3    | NCT00735644 | Philippines, Thailand             |
| JE-CV, Varicella                  | Safety, Immunogenicity, Longevity (Co-administration)    | Chimeric live attenuated                  | 3    | NCT01190228 | Philippines                       |
| JE-CV, SA14-14-2                  | Safety, Immunogenicity (Co-administration)               | Chimeric live attenuated, Live attenuated | 3    | NCT01092507 | Thailand                          |
| ChimeriVax™-JE                    | Safety, Tolerability, Immunogenicity                     | Chimeric live attenuated                  | 2    | NCT00621764 | Thailand                          |
| ChimeriVax™-JE                    | Safety, Tolerability, Immunogenicity                     | Chimeric live attenuated                  | 2    | NCT00981630 | Australia                         |
| ChimeriVax™-JE                    | Safety, Tolerability, Immunogenicity                     | Chimeric live attenuated                  | 3    | NCT00314132 | United States, Australia          |
| ChimeriVax™-JE                    | Safety, Immunogenicity, Longevity                        | Chimeric live attenuated                  | 2    | NCT00981175 | Australia                         |
| ChimeriVax™-JE, JE-MBDV           | Safety, Tolerability, Immunogenicity (Co-administration) | Chimeric live attenuated                  | 2    | NCT00441259 | India                             |
| Different doses of JEVAX          | Safety, Immunogenicity                                   | Inactive                                  | 2    | NCT02816554 | Vietnam                           |
| Different doses of JEVAX          | Safety, Immunogenicity                                   | Inactive                                  | 3    | NCT03282370 | Vietnam                           |
| BR JEV, KD-287 ENCEVAC or JEV-GCC | Longevity (Co-administration)                            | Inactive                                  | 4    | NCT02532569 | Korea                             |
| KD-287, JE vaccine                | Safety, Immunogenicity (Co-administration)               | Inactive                                  | 3    | NCT01150942 | Korea                             |
| IC51, HARVIX                      | Safety, Immunogenicity (Co-administration)               | Inactive and                              | 3    | NCT00596271 | Philippines                       |
| IC51, HARVIX, Prevnar             | Safety, Immunogenicity (Co-administration)               | Inactive and                              | 3    | NCT01041573 | Philippines                       |
| IC51(IXIARO®, JESPECT®)           | Safety, Immunogenicity, Longevity                        | Inactive                                  | 3    | NCT01246479 | United States, Australia, Germany |
| IC51                              | Immunogenicity and Longevity                             | Inactive                                  | 3    | NCT00776230 | Australia, Germany                |
| LJEV, MCV                         | Immunogenicity (Co-administration)                       | Live attenuated                           | 4    | NCT02643433 | China                             |
| JE-CV                             | Safety, Immunogenicity, Longevity                        | Chimeric Live attenuated                  | 3    | NCT01001988 | Philippines and Thailand          |
| JE-CV, MMR                        | Immunogenicity (Co-administration)                       | Chimeric live attenuated, Live attenuated | 3    | NCT01188343 | Taiwan                            |
| Chimeravax™-JE, Stamaril®         | Safety, Tolerability, Immunogenicity (co-administration) | Chimeric live attenuated, Live attenuated | 2    | NCT00982137 | Australia                         |
| SA 14-14-2, MV                    | Safety, Immunogenicity (co-administration)               | Live attenuated                           | 3    | NCT00249769 | Philippines                       |
| JEVAC                             | Safety, Immunogenicity, Longevity                        | Inactive                                  | 3    | NCT01408537 | Thailand                          |
| SA 14-14-2, MMR                   | Safety, Immunogenicity (Co-administration)               | Live attenuated                           | 4    | NCT02880865 | Philippines                       |
| IMOJEV, CD JEVAX                  | Safety, Immunogenicity (Co-administration)               | Chimeric, Live attenuated                 | 4    | NCT02526550 | Thailand                          |
